# Supplementary material
Source: publisher site journal article supplement (https://www.spandidos-publications.com/5375/downloadSupplementary)
Supplement: Supplementary file 1 [file downloadSupplementary]

Video S1: 37 week pregnant women prenatal ultrasound examination.

Video S2: Postnatal ultrasound examination.
